# Supplementary material
Source: PubMed Central journal article supplement (PMC10106100)
Supplement: NIHMS1887325-supplement-Supplemental_Materials.pdf [file NIHMS1887325-supplement-Supplemental_Materials.pdf]

Supplemental online content for:

## Association of Polypharmacy and Potentially Inappropriate Medications With Frailty Among Older Adults With Blood Cancers

Tammy T. Hshieh, MD, MPH; Clark DuMontier, MD, MPH; Timothy Jaung, MS; Nupur E. Bahl, BA; Chelsea E. Hawley, PharmD, MPH; Lee Mozessohn, MD; Richard M. Stone, MD; Robert J. Soiffer, MD; Jane A. Driver, MD, MPH; and Gregory A. Abel, MD, MPH

*J Natl Compr Canc Netw* 2022;20(8):915–923.e5

**eTable 1:** Frailty Scoring Values

**eTable 2:** Univariable Models of Association Between Polypharmacy and PIMs

**eAppendix 1:** Supplemental Methods

**eTable 1. Frailty Scoring Values**

| <b>eTable 1.1: Cumulative Deficit Model Variable Index and Scoring</b> |                                                                      |                                                                    |
|------------------------------------------------------------------------|----------------------------------------------------------------------|--------------------------------------------------------------------|
| <b>Obtainment</b>                                                      | <b>Measured Variable</b>                                             | <b>CDM Scoring (Scaled 0–1)</b>                                    |
| Patient questionnaire                                                  | 1 Bathing                                                            | With some help or completely unable = 1; Without help = 0          |
|                                                                        | 2 Dressing                                                           |                                                                    |
|                                                                        | 3 Getting in/out of chair                                            |                                                                    |
|                                                                        | 4 Walking around house <sup>a</sup>                                  |                                                                    |
|                                                                        | 5 Eating                                                             |                                                                    |
|                                                                        | 6 Grooming                                                           |                                                                    |
|                                                                        | 7 Using toilet                                                       |                                                                    |
|                                                                        | 8 Getting up/down stairs                                             |                                                                    |
|                                                                        | 9 Lifting 10 lb                                                      |                                                                    |
|                                                                        | 10 Shopping                                                          |                                                                    |
|                                                                        | 11 Doing housework                                                   |                                                                    |
|                                                                        | 12 Meal preparations                                                 |                                                                    |
|                                                                        | 13 Taking medication                                                 |                                                                    |
|                                                                        | 14 Handling finances                                                 |                                                                    |
|                                                                        | 15 Walk outside                                                      | <3 days = 1; ≥3 days = 0                                           |
|                                                                        | 16 Self-report ECOG PS                                               | 3–4 = 1; 1–2 = 0.5; 0 = 0                                          |
|                                                                        | 17 Self-rating of health                                             | Poor = 1; Fair = 0.75; Good = 0.5; Very good = 0.25; Excellent = 0 |
|                                                                        | 18 How health has changed in last year                               | Worse = 1; Better/Same = 0                                         |
|                                                                        | 19 Stayed in bed at least half the day due to health (in last month) | Yes = 1; No = 0                                                    |
|                                                                        | 20 Cut down on usual activity (in last month)                        |                                                                    |
|                                                                        | 21 Lost >10 lb in last year <sup>a</sup>                             |                                                                    |
|                                                                        | 22 Feel everything is an effort <sup>a</sup>                         | Most of time = 1; Some of the time = 0.5; Rarely = 0               |
|                                                                        | 23 Have trouble getting going <sup>a</sup>                           |                                                                    |
|                                                                        | 24 Feel depressed                                                    |                                                                    |
|                                                                        | 25 Feel lonely                                                       | Most of time = 0; Some of the time = 0.5; Rarely = 1               |
|                                                                        | 26 Feel happy                                                        |                                                                    |
| Patient medical record                                                 | 27 High blood pressure                                               | Yes = 1; Suspect = 0.5; No = 0                                     |
|                                                                        | 28 Heart attack                                                      |                                                                    |
|                                                                        | 29 Congestive heart failure                                          |                                                                    |
|                                                                        | 30 Stroke                                                            |                                                                    |
|                                                                        | 31 Cancer                                                            |                                                                    |
|                                                                        | 32 Diabetes                                                          |                                                                    |
|                                                                        | 33 Arthritis                                                         |                                                                    |
|                                                                        | 34 Chronic lung disease                                              |                                                                    |
|                                                                        | 35 Body mass index                                                   |                                                                    |

(continued on next page)

**eTable 1. Frailty Scoring Values (cont.)**

| <b>eTable 1.1: Cumulative Deficit Model Variable Index and Scoring (cont.)</b> |                                            |                                           |
|--------------------------------------------------------------------------------|--------------------------------------------|-------------------------------------------|
| <b>Obtainment</b>                                                              | <b>Measured Variable</b>                   | <b>CDM Scoring (Scaled 0–1)</b>           |
| Assessed by research staff                                                     | 36 Grip strength <sup>a</sup>              | See eTables 1.1A–C for cutpoints          |
|                                                                                | 37 Usual pace walk speed                   |                                           |
|                                                                                | 38 Rapid pace walk speed <sup>a</sup>      |                                           |
|                                                                                | 39 MoCA 5-word delayed recall              |                                           |
|                                                                                | 40 Clock-in-the-Box test                   |                                           |
|                                                                                | 41 Ability to explain presentation to DFCI | With help or unable = 1; Without help = 0 |
|                                                                                | 42 Ability to fill out the questionnaire   |                                           |

Abbreviations: CDM, cumulative deficit model; DFCI, Dana-Farber Cancer Institute; MoCA, Montreal Cognitive Assessment; PS, performance status.

<sup>a</sup>Also used in calculation of Phenotype Frailty Score.

| <b>eTable 1.1A: Physical Variable Cutpoints<sup>1</sup></b> |                                                                       |                                                                                                    |                           |
|-------------------------------------------------------------|-----------------------------------------------------------------------|----------------------------------------------------------------------------------------------------|---------------------------|
| <b>Variable</b>                                             | <b>Deficit for Men</b>                                                | <b>Deficit for Women</b>                                                                           | <b>Source of Cutpoint</b> |
| Body mass index (kg/m <sup>2</sup> )                        | <18.5, ≥30 as a deficit,<br>25 to <30 as a 'half deficit'             | <18.5, ≥30 as a deficit<br>25 to <30 as a 'half deficit'                                           | Published <sup>2</sup>    |
| Grip strength (kg)                                          | For BMI ≤24: GS ≤29<br>For BMI 24.1–28: GS ≤30<br>For BMI >28: GS ≤32 | For BMI ≤23: GS ≤17<br>For BMI 23.1–26: GS ≤17.3<br>For BMI 26.1–29: GS ≤18<br>For BMI >29: GS ≤21 | Published <sup>3,4</sup>  |
| Rapid pace walk                                             | <0.61 m/s (6.56 s)                                                    | <0.61 m/s (6.56 s)                                                                                 | Published <sup>4</sup>    |
| Usual pace walk                                             | <0.38 m/s (10.50 s)                                                   | <0.38 m/s (10.50 s)                                                                                | Published <sup>5</sup>    |

Abbreviations: BMI, body mass index; GS, grip strength.

| <b>eTable 1.1B: MoCA 5-Word Delayed Recall Normative Data and Cutpoints<sup>6</sup></b> |                       |           |                                  |           |                            |           |
|-----------------------------------------------------------------------------------------|-----------------------|-----------|----------------------------------|-----------|----------------------------|-----------|
|                                                                                         | <b>Normal Control</b> |           | <b>Mild Cognitive Impairment</b> |           | <b>Alzheimer's Disease</b> |           |
|                                                                                         | <b>Average</b>        | <b>SD</b> | <b>Average</b>                   | <b>SD</b> | <b>Average</b>             | <b>SD</b> |
| Memory                                                                                  | 3.73                  | 1.27      | 1.17                             | 1.47      | 0.52                       | 1.03      |
| Words recalled successfully                                                             | 5                     | 4         | 3                                | 2         | 1                          | 0         |

(continued on next page)

**eTable 1. Frailty Scoring Values (cont.)**

| <b>eTable 1.1B: (cont.)</b> |                |      |                           |      |                     |    |
|-----------------------------|----------------|------|---------------------------|------|---------------------|----|
|                             | Normal Control |      | Mild Cognitive Impairment |      | Alzheimer's Disease |    |
|                             | Average        | SD   | Average                   | SD   | Average             | SD |
| Corresponding CDM score     | 0              | 0.25 | 0.5                       | 0.75 | 1                   | 1  |

  

| <b>eTable 1.1C: CIB Normative Data for Age and Education and Cutpoints<sup>7</sup></b> |                            |                  |              |                      |     |
|----------------------------------------------------------------------------------------|----------------------------|------------------|--------------|----------------------|-----|
| Age                                                                                    | Education                  |                  |              |                      |     |
|                                                                                        | Less Than High School [SD] | High School [SD] | College [SD] | Graduate School [SD] |     |
| 75–79 y                                                                                | 5.1 [1.9]                  | 6.3 [1.6]        | 6.4 [1.3]    | 6.6 [1.4]            |     |
| 80–84 y                                                                                | 4.6 [1.9]                  | 5.8 [1.5]        | 5.9 [1.6]    | 6.7 [1.2]            |     |
| ≥85 y                                                                                  | 4.9 [1.3]                  | 5.4 [1.3]        | 5.8 [1.7]    | 6.5 [1.5]            |     |
| CIB score                                                                              | 8                          | 7                | 6            | 5                    | 0–4 |
| Corresponding CDM score                                                                | 0                          | 0.25             | 0.5          | 0.75                 | 1   |

Abbreviations: CDM, cumulative deficit model; CIB, Clock-in-the-Box.

#### Calculation of Cumulative Deficit Frailty Score:

To calculate the cumulative frailty score, sum all points given for each deficit and divide by number of total points possible. Cumulative frailty score cutpoints<sup>5</sup> are as follows: <0.2 is robust, 0.2–0.35 is prefrail, and >0.35 is frail.

| <b>eTable 1.2: Phenotype Frailty Score</b> |                         |                          |                                                                                  |
|--------------------------------------------|-------------------------|--------------------------|----------------------------------------------------------------------------------|
|                                            | Index Item <sup>a</sup> | Measured Variable        | Scoring                                                                          |
| 1                                          | 21                      | Weight loss              | Yes = 1; No = 0                                                                  |
| 2                                          | 22, 23                  | Self-reported exhaustion | Most of the time (for either) = 1; Some or rarely (for both) = 0                 |
| 3                                          | 4                       | Energy expenditure       | Some assistance or completely unable = 1; Without assistance = 0                 |
| 4                                          | 38                      | Gait speed (rapid pace)  | Slower than cutpoint = 1; Faster than cutpoint = 0                               |
| 5                                          | 36                      | Grip strength            | Weaker than cutpoint = 1 (for strongest measurement); Stronger than cutpoint = 0 |

<sup>a</sup>Numbers correspond to item number in Cumulative Deficit Model Variable Index (see supplemental eTable 1.1).

#### Calculation of Phenotype Frailty Score:

Sum all points given for each of the 5 deficits. Phenotype frailty cutpoints<sup>3</sup> are as follows: 0 is robust, 1–2 is prefrail, and 3–5 is frail.

## References

- Searle SD, Mitnitski A, Gahbauer EA, et al. A standard procedure for creating a frailty index. *BMC Geriatr* 2008;8:24.
- Flegal KM, Graubard BI, Williamson DF, et al. Cause-specific excess deaths associated with underweight, overweight, and obesity. *JAMA* 2007;298:2028–2037.
- Fried LP, Tangen CM, Walston J, et al. Frailty in older adults: evidence for a phenotype. *J Gerontol A Biol Sci Med Sci* 2001;56:M146–156.
- Gill TM, Gahbauer EA, Allore HG, et al. Transitions between frailty states among community-living older persons. *Arch Intern Med* 2006; 166:418–423.
- Sheppard VB, Faul LA, Luta G, et al. Frailty and adherence to adjuvant hormonal therapy in older women with breast cancer: CALGB protocol 369901. *J Clin Oncol* 2014;32:2318–2327.
- Nasreddine ZS, Phillips NA, Bédirian V, et al. The Montreal Cognitive Assessment, MoCA: a brief screening tool for mild cognitive impairment. *J Am Geriatr Soc* 2005;53:695–699.
- Chester JG, Grande LJ, Milberg WP, et al. Cognitive screening in community-dwelling elders: performance on the clock-in-the-box. *Am J Med* 2011;124: 662–669.

**eTable 2. Univariable Models of Association Between Polypharmacy and PIMs**

| Variable       | Univariable Analysis (n=468)        |                     |                                  |
|----------------|-------------------------------------|---------------------|----------------------------------|
|                | Frailty <sup>a</sup><br>OR (95% CI) | MoCA<br>OR (95% CI) | CIB<br>OR (95% CI)               |
| Polypharmacy   |                                     |                     |                                  |
| ≤5 medications | Ref                                 | Ref                 | Ref                              |
| >5 medications | 1.701 (1.104–2.625) <sup>a</sup>    | 1.421 (0.738–2.971) | 1.208 (0.702–2.762)              |
| Polypharmacy   |                                     |                     |                                  |
| <8 medications | Ref                                 | Ref                 | Ref                              |
| ≥8 medications | 3.304 (2.267–4.862)                 | 1.123 (0.662–1.928) | 1.716 (1.080–2.769) <sup>a</sup> |
| Polypharmacy   |                                     |                     |                                  |
| Continuous     | 1.099 (1.062–1.139)                 | 1.014 (0.966–1.061) | 1.013 (0.973–1.055)              |
| ARS            |                                     |                     |                                  |
| Continuous     | 1.229 (1.061–1.424) <sup>a</sup>    | 0.902 (0.691–1.125) | 0.882 (0.705–1.070)              |
| GO-PIM scale   |                                     |                     |                                  |
| Continuous     | 1.770 (1.450–2.169)                 | 1.108 (0.834–1.448) | 0.943 (0.729–1.203)              |

Abbreviations: ARS, Anticholinergic Risk Scale; OR, odds ratio; CIB, Check-in-the-Box; MoCA, Montreal Cognitive Assessment; GO-PIM, Geriatric Oncology Potentially Inappropriate Medications; PIMs, potentially inappropriate medications.

<sup>a</sup>Fit with ordinal logistic regression.

---

## eAppendix 1. Supplemental Methods

### Anticholinergic Risk Scale

The Anticholinergic Risk Scale (ARS) is a tool developed by Rudolph et al<sup>1</sup> to identify patients who may be at increased risk of anticholinergic adverse effects as a result of the medications they take. To develop this scale, a panel of 2 geriatric pharmacists and 1 geriatrician evaluated a list of the 500 most prescribed medications among a retrospective geriatric evaluation and management cohort and a prospective older primary care population at the Veterans Affairs Boston Healthcare System between 2004 and 2006. The panel members reviewed each medication for (1) the dissociation constant for the cholinergic receptor, (2) evidence reflecting rates of anticholinergic adverse effects compared with placebo, and (3) a review of medical literature related to anticholinergic adverse effects.<sup>1</sup> Panel members then ranked medications on a scale of 0 to 3, where 0 indicated limited to no anticholinergic potential, 1 indicated moderate potential, 2 indicated strong potential, and 3 indicated very strong potential. Topical, ophthalmic, otologic, and inhaled medications were excluded from review and are not included in the scale. An individual's total risk according to the ARS scale is quantified by summing the ranked scores for all medications taken.

### Geriatric Oncology Potentially Inappropriate Medications Scale

NCCN Clinical Practice Guidelines in Oncology (NCCN Guidelines) are published annually to provide updated recommendations for health professionals who manage patients with cancer. To provide specific guidelines that address the issues unique to older adults, NCCN releases Guidelines for Older Adult Oncology, produced by a panel of experts in geriatric medicine, oncology, internal medicine, and supportive care.<sup>2</sup> The NCCN Guidelines for Older Adult Oncology provide a list of medications commonly used for supportive care that are of concern for older patients; additionally, the guidelines offer recommendations for dosage, administration, and alternatives for the listed medications. We translated this list, as found in the NCCN Guidelines for Older Adult Oncology, Version 1.2020,<sup>3</sup> into a scale that allowed us to quantify cancer-specific potentially inappropriate medication (PIM) burden for an individual. This scale, called the Geriatric Oncology Potentially Inappropriate Medications (GO-PIM) scale, counts for each patient the number of medications on the NCCN list of Medications Commonly Used for Supportive Care That Are of Concern in Older Patients,<sup>2</sup> with more medications suggesting higher risk.

---

## References

1. Rudolph JL, Salow MJ, Angelini MC, et al. The anticholinergic risk scale and anticholinergic adverse effects in older persons. *Arch Intern Med* 2008;168:508–513.
2. Dotan E, Walter LC, Beechinor R et al. NCCN Clinical Practice Guidelines in Oncology: Older Adult Oncology. Version 1.2022. Accessed April 1, 2022. To view the most recent version, visit [NCCN.org](https://www.nccn.org)
3. Dotan E, Walter LC, Baumgartner J, et al. NCCN Clinical Practice Guidelines in Oncology: Older Adult Oncology. Version 1.2020. To view the most recent version, visit [NCCN.org](https://www.nccn.org)
